# Supplementary material for: The effect of swimming exercise and diet on the hypothalamic inflammation of ApoE-/- mice based on SIRT1-NF-κB-GnRH expression
Source: PubMed Central journal article supplement (PMC7346084; doi:10.18632/aging.103323), 2020-06-09
Supplement: aging-12-103323-s001..pdf [file aging-12-103323-s001..pdf]

## SUPPLEMENTARY TABLE

**Supplementary Table 1. Comparison of serum lipid levels (mmol / L; means  $\pm$  SD).**

| <b>Group</b>                      | <b>n</b> | <b>TC</b>           | <b>TG</b>         | <b>LDL</b>         | <b>HDL</b>        |
|-----------------------------------|----------|---------------------|-------------------|--------------------|-------------------|
| ApoE <sup>-/-</sup> normal diet   | 6        | 34.86 $\pm$ 4.08    | 1.02 $\pm$ 0.07   | 9.17 $\pm$ 0.81    | 2.52 $\pm$ 0.57   |
| ApoE <sup>-/-</sup> High fat diet | 6        | 59.87 $\pm$ 14.66** | 1.80 $\pm$ 0.44** | 19.94 $\pm$ 1.89** | 1.51 $\pm$ 0.38** |
| <i>P</i>                          |          | <0.01               | <0.01             | <0.01              | <0.01             |

12 weeks old ApoE<sup>-/-</sup> mice fed with high-fat diet for 6 weeks. Compared with ApoE<sup>-/-</sup> normal diet group, \*\*  $p < 0.01$ . (Chinese Pharmacological Bulletin 2020 Apr;36(4)).
